# Supplementary material for: Extended Safety Analysis of Baricitinib 2 mg in Adult Patients with Atopic Dermatitis: An Integrated Analysis from Eight Randomized Clinical Trials
Source: Springer Nature journal article supplement (doi:10.1007/s40257-021-00602-x), 2021-04-07
Supplement: MOESM1 [file 19043418]

## SUPPLEMENTARY FILE

**Journal:** American Journal of Clinical Dermatology

**Article title:** Extended safety analysis of baricitinib 2 mg in adult patients with atopic dermatitis: an integrated analysis from 8 randomized clinical trials

**Authors:** Brett King, MD, PhD<sup>1</sup>, Catherine Maari, MD<sup>2</sup>, Edward Lain, MD, MBA<sup>3</sup>, Jonathan I. Silverberg, MD, PhD, MPH<sup>4</sup>, Maher Issa, MS<sup>5</sup>, Katrin Holzwarth, MD<sup>5</sup>, Dennis Brinker, PharmD, MS<sup>5</sup>, Tracy Cardillo, MS<sup>5</sup>, Fabio P. Nunes, MD, MMSc<sup>5</sup>, Eric L. Simpson, MD, MCR<sup>6</sup>

<sup>1</sup>Department of Dermatology, Yale School of Medicine, New Haven, CT, USA

<sup>2</sup>Innovaderm Research, Montreal, Quebec, Canada

<sup>3</sup>Sanova Dermatology, Pflugerville, TX, USA

<sup>4</sup>Department of Dermatology, George Washington University School of Medicine, Washington DC, USA

<sup>5</sup>Eli Lilly and Company, Indianapolis, IN, USA

<sup>6</sup>Department of Dermatology, Oregon Health and Science University, Portland, OR, USA

**Corresponding author:** Dr. Brett King; Email: brett.king@yale.edu

### Table of Contents—online supplement

|            |                                                                                     |
|------------|-------------------------------------------------------------------------------------|
| Page 2-3:  | Supplementary Methods                                                               |
| Page 4:    | Supplementary Results                                                               |
| Page 5-6:  | <b>Table S1.</b> Summary of patient populations included in the integrated analysis |
| Page 7-10: | <b>Table S2.</b> Safety outcome definition and assessments                          |
| Page 11:   | <b>Table S3.</b> Conjunctival disorders by preferred term within cluster            |
| Page 12:   | <b>Fig. S1.</b> Selected laboratory analytes over time                              |
| Page 13:   | References                                                                          |

## Supplementary Methods

### Key inclusion criteria

1. Are at least 18 years of age
2. Have moderate to severe atopic dermatitis (AD), defined as:
  - a. Eczema Area and Severity Index score of  $\geq 16$  ( $\geq 12$  for the phase 2 study)
  - b. Validated Investigator Global Assessment for Atopic Dermatitis (vIGA-AD<sup>TM</sup>) score of  $\geq 3$  (not used in the phase 2 study)
  - c.  $\geq 10\%$  body surface area involvement at baseline
3. Have a documented history of inadequate response to topical therapies and, in BREEZE-AD4, an inadequate response to cyclosporine.

### Key exclusion criteria

Patients were excluded from study enrollment if they met any of the following criteria:

1. Currently experiencing or have a history of other concomitant skin conditions that could affect assessment of AD lesions.
2. A history of eczema herpeticum (EH) within 12 months prior to screening or  $\geq 2$  episodes of EH in the past.
3. Have experienced a venous thromboembolism (VTE) or major adverse cardiovascular event (MACE) within 12 weeks of screening or are at high risk of VTE, the definition of which varied by study:
  - a. For BREEZE-AD1, BREEZE-AD2, BREEZE-AD4, and BREEZE-AD7: have a history of recurrent ( $\geq 2$ ) VTE or are considered at high risk of VTE as deemed by the investigator.
  - b. For BREEZE-AD5: have a history of VTE, or are considered at high risk for VTE as deemed by the investigator, or have 2 or more of the following risk factors for VTE:
    - i. Aged  $>65$  years
    - ii. BMI  $>35$  kg/m<sup>2</sup>
    - iii. Oral contraceptive use and current smoker
  - c. For BREEZE-AD6: have a history of VTE or are considered at high risk of VTE as deemed by the investigator.

**Description for adjudication**

All adverse events (AEs) suggestive of a possible MACE, DVT, pulmonary embolisms (PE), or other peripheral venous thrombosis were adjudicated in a blinded manner by an experienced external independent clinical event committee. Adjudication determined whether these AEs qualified as MACE, DVT, PE, or other peripheral venous thrombosis based on evaluation of case descriptions and any diagnostic tests available. AEs meeting the adjudication committee definitions for these specific events were considered positively adjudicated. A positively adjudicated event provides additional diagnostic confirmation but does not assess causal relationship to the study drug. Further details are provided in Table S2.

## **Supplementary Results**

### **Selected laboratory analytes over time**

#### *Hematology*

Mean platelet counts increased with baricitinib 2 mg at Weeks 4–16 and remained increased through 68 weeks of treatment. Mean hemoglobin and neutrophil counts decreased with baricitinib 2 mg at Week 4 and stabilized slightly below baseline over time. Mean lymphocyte counts increased with baricitinib 2 mg at Week 4 and returned to baseline over time (Figure S1).

#### *Cholesterol*

Mean low-density lipoproteins (LDL) and high-density lipoproteins (HDL) were elevated with baricitinib 2 mg at Week 24 and Week 12, respectively, and remained elevated through 68 weeks of treatment (Figure S1).

#### *Hepatic*

Mean alanine aminotransferase (ALT) remained largely stable throughout the treatment period with baricitinib 2 mg (Figure S1).

**Table S1** Summary of patient populations included in the integrated analysis

| Study                     | Treatments <sup>a</sup>    | Dataset            | Baricitinib therapy                                   | Treatment period (weeks)                                                        | Data cutoff     |
|---------------------------|----------------------------|--------------------|-------------------------------------------------------|---------------------------------------------------------------------------------|-----------------|
| PHASE 2                   |                            |                    |                                                       |                                                                                 |                 |
| I4V-MC-JAHG (NCT02576938) | Placebo ( <i>N</i> =49)    | Placebo-controlled | In combination with TCS                               | 16                                                                              | 14 March 2017   |
|                           | Bari 2 mg ( <i>N</i> =37)  | All-bari-2-mg-AD   |                                                       |                                                                                 |                 |
| PHASE 3                   |                            |                    |                                                       |                                                                                 |                 |
| BREEZE-AD1 (NCT03334396)  | Placebo ( <i>N</i> =249)   | Placebo-controlled | Monotherapy (rescue with TCS permitted <sup>b</sup> ) | 16                                                                              | 17 January 2019 |
|                           | Bari 2 mg ( <i>N</i> =123) | All-bari-2-mg-AD   |                                                       |                                                                                 |                 |
| BREEZE-AD2 (NCT03334422)  | Placebo ( <i>N</i> =244)   | Placebo-controlled | Monotherapy (rescue with TCS permitted <sup>b</sup> ) | 16                                                                              | 24 January 2019 |
|                           | Bari 2 mg ( <i>N</i> =123) | All-bari-2-mg-AD   |                                                       |                                                                                 |                 |
| BREEZE-AD7 (NCT03733301)  | Placebo ( <i>N</i> =109)   | Placebo-controlled | In combination with TCS                               | 16                                                                              | 29 August 2019  |
|                           | Bari 2 mg ( <i>N</i> =109) | All-bari-2-mg-AD   |                                                       |                                                                                 |                 |
| BREEZE-AD4 (NCT03428100)  | Placebo ( <i>N</i> =93)    | Placebo-controlled | In combination with TCS                               | 16 weeks for placebo-controlled; study is ongoing (>74 weeks for this analysis) | 24 April 2020   |
|                           | Bari 2 mg ( <i>N</i> =185) | All-bari-2-mg-AD   |                                                       |                                                                                 |                 |
| BREEZE-AD5 (NCT03435081)  | Placebo ( <i>N</i> =147)   | Placebo-controlled | Monotherapy (weeks 0 to 16)                           | 16 weeks for placebo-controlled; study is                                       | 24 April 2020   |

|                                          |                                                                                                                         |                  |                                           |                                                                                                                                            |               |
|------------------------------------------|-------------------------------------------------------------------------------------------------------------------------|------------------|-------------------------------------------|--------------------------------------------------------------------------------------------------------------------------------------------|---------------|
|                                          | Bari 2 mg ( <i>N</i> =146)                                                                                              | All-bari-2-mg-AD | In combination with TCS (weeks 16 to 104) | ongoing (>89 weeks for this analysis)                                                                                                      |               |
| <b>LTE</b>                               |                                                                                                                         |                  |                                           |                                                                                                                                            |               |
| BREEZE-AD3 <sup>c</sup><br>(NCT03334435) | Placebo ( <i>N</i> =86)<br><br>Bari 2 mg ( <i>N</i> =512)<br><br>Open-label addendum:<br><br>Bari 2 mg ( <i>N</i> =247) | All-bari-2-mg-AD | In combination with TCS                   | 200 weeks; study is ongoing (>108 cumulative weeks for this analysis that includes patients from originating studies BREEZE-AD1, AD2, AD7) | 24 April 2020 |
| BREEZE-AD6 <sup>d</sup><br>(NCT03559270) | Bari 2 mg ( <i>N</i> =322)                                                                                              | All-bari-2-mg-AD | In combination with TCS                   | 104 weeks; study is ongoing (>89 cumulative weeks for this analysis that includes patients from BREEZE-AD5)                                | 24 April 2020 |

---

*AD* atopic dermatitis, *Bari* baricitinib, *LTE* long-term extension, *TCS* topical corticosteroids

<sup>a</sup>Treatment arms depicted in table are representative of those included in this analysis and may not include all treatment arms included in the studies

<sup>b</sup>Investigators were required to attempt to manage patients with emollients; however, patients who experienced unacceptable or worsening symptoms of AD could be rescued at any time at the discretion of the investigator

<sup>c</sup>Patients from studies BREEZE-AD1, BREEZE-AD2, and BREEZE-AD7 were eligible to enroll in BREEZE-AD3

<sup>d</sup>Patients from study BREEZE-AD5 were eligible to enroll in BREEZE-AD6

**Table S2** Safety outcome definition and assessments

| <b>Safety Outcome</b>                                   | <b>Definition/Assessment</b>                                                                                                                                                                                                                                                                                                                                                                                                                                                                                                                                                  |
|---------------------------------------------------------|-------------------------------------------------------------------------------------------------------------------------------------------------------------------------------------------------------------------------------------------------------------------------------------------------------------------------------------------------------------------------------------------------------------------------------------------------------------------------------------------------------------------------------------------------------------------------------|
| <b>Treatment-emergent adverse events<sup>a</sup></b>    |                                                                                                                                                                                                                                                                                                                                                                                                                                                                                                                                                                               |
| TEAE                                                    | An event that first occurred or worsened in severity after the first dose of study treatment, and on or prior to the last visit date during the analysis period (treatment period plus up to 30 days off-drug follow-up time)                                                                                                                                                                                                                                                                                                                                                 |
| SAE                                                     | Any event meeting ICH E2A seriousness criteria                                                                                                                                                                                                                                                                                                                                                                                                                                                                                                                                |
| TEAE leading to temporary interruption of study drug    | When study drug was temporarily interrupted because of an adverse event, either as defined in the study protocol or as determined by the investigator, and study drug was restarted per protocol or at the discretion of the investigator                                                                                                                                                                                                                                                                                                                                     |
| TEAE leading to permanent discontinuation of study drug | When study drug was permanently discontinued because of an adverse event either as defined in the study protocol or as determined by the investigator                                                                                                                                                                                                                                                                                                                                                                                                                         |
| <b>Adverse events of special interest<sup>b</sup></b>   |                                                                                                                                                                                                                                                                                                                                                                                                                                                                                                                                                                               |
| Infections                                              |                                                                                                                                                                                                                                                                                                                                                                                                                                                                                                                                                                               |
| Serious infections                                      | All infections that met the ICH SAE criteria                                                                                                                                                                                                                                                                                                                                                                                                                                                                                                                                  |
| Herpes zoster                                           | Events were reported using the preferred term of herpes zoster                                                                                                                                                                                                                                                                                                                                                                                                                                                                                                                |
| Herpes simplex                                          | The cluster for herpes simplex included preferred terms of herpes simplex, oral herpes, Kaposi's varicelliform eruption, eczema herpeticum, ophthalmic herpes simplex, genital herpes, and genital herpes simplex. All cases of herpes simplex were assessed for skin condition at the time of infection using the vIGA-AD                                                                                                                                                                                                                                                    |
| Eczema herpeticum                                       | The cluster for eczema herpeticum included the preferred terms of eczema herpeticum and Kaposi's varicelliform eruption                                                                                                                                                                                                                                                                                                                                                                                                                                                       |
| Tuberculosis                                            | Cases of tuberculosis were classified separately from opportunistic infections (OIs)                                                                                                                                                                                                                                                                                                                                                                                                                                                                                          |
| Opportunistic infections                                | <p>Potential OIs were identified using a list of MedDRA preferred terms, created to align with the consensus recommendations for reporting OIs in clinical trials and post marketing surveillance of drugs used to treat immune-mediated inflammatory diseases[1]. Modifications to this approach were:</p> <ul style="list-style-type: none"> <li>• Candidiasis infections involving only the oral cavity and pharynx were not considered as OIs; to meet criteria for classification as OI, diagnostic evidence must confirm infection of the esophagus or below</li> </ul> |

| Safety Outcome | Definition/Assessment                                                                                                                                                                                                                                                                                                                                                                                                                                                                                                                                                                                                                                                                                                                                                                                                                                                                                                                                                                      |
|----------------|--------------------------------------------------------------------------------------------------------------------------------------------------------------------------------------------------------------------------------------------------------------------------------------------------------------------------------------------------------------------------------------------------------------------------------------------------------------------------------------------------------------------------------------------------------------------------------------------------------------------------------------------------------------------------------------------------------------------------------------------------------------------------------------------------------------------------------------------------------------------------------------------------------------------------------------------------------------------------------------------|
| Malignancy     | <ul style="list-style-type: none"> <li>Localized herpes zoster infections were not considered OIs; only multidermatomal (&gt;3 dermatomes) and/or disseminated infections were considered OIs. A second event of herpes zoster was adjudicated to be an OI if it was a second discrete herpes zoster infection in a different location</li> <li>Treatment-emergent, active tuberculosis infections were summarized separately from OIs</li> </ul> <p>The cases of potential OIs were medically reviewed internally by 2 blinded medical physicians and/or clinical research scientists, completing separate reviews, to determine whether they met the definition of and were classified as OIs</p> <p>Malignancies were identified using terms from the malignant tumors SMQ (SMQ 20000194). NMSCs and malignancies excluding NMSCs were reported separately. All cases identified by the malignant tumors SMQ were assessed through medical review to determine confirmed NMSC cases</p> |
| NMSC           | <p>Cases of NMSC were defined by the terms:</p> <ul style="list-style-type: none"> <li>Squamous cell carcinoma of skin</li> <li>Bowen's disease</li> <li>Basal cell carcinoma</li> <li>Basosquamous carcinoma</li> <li>Basosquamous carcinoma of skin</li> <li>Squamous cell carcinoma</li> <li>Skin squamous cell carcinoma metastatic</li> <li>Skin cancer</li> <li>Carcinoma in situ of skin</li> <li>Keratoacanthoma</li> <li>Vulvar squamous cell hyperplasia</li> <li>Skin squamous cell carcinoma recurrent</li> </ul>                                                                                                                                                                                                                                                                                                                                                                                                                                                              |
| MACE           | <p>Events were identified by the investigative site or through medical review and were sent to a blinded external Clinical Event Committee for adjudication. Positively adjudicated cardiovascular events categorized as MACE included:</p> <ul style="list-style-type: none"> <li>Cardiovascular death</li> <li>Myocardial infarction</li> <li>Stroke</li> </ul>                                                                                                                                                                                                                                                                                                                                                                                                                                                                                                                                                                                                                          |
| DVT and/or PE  | <p>Events were identified by the investigative site or through medical review and were sent to a blinded external Clinical Event Committee for adjudication. This committee categorized events as:</p> <ul style="list-style-type: none"> <li>DVT (above the knee)</li> <li>PE</li> <li>or other peripheral venous thrombosis</li> </ul>                                                                                                                                                                                                                                                                                                                                                                                                                                                                                                                                                                                                                                                   |

| Safety Outcome               | Definition/Assessment                                                                                                                                                                                                                                                                                                                                                                                                                                                                                                                                                                                                                                                 |
|------------------------------|-----------------------------------------------------------------------------------------------------------------------------------------------------------------------------------------------------------------------------------------------------------------------------------------------------------------------------------------------------------------------------------------------------------------------------------------------------------------------------------------------------------------------------------------------------------------------------------------------------------------------------------------------------------------------|
| Gastrointestinal perforation | TEAEs related to potential GI perforations were analyzed using reported AEs. Identification of these events was based on review of the preferred terms of the MedDRA SMQ 20000107, GI perforations. Potential GI perforations identified by the SMQ search were provided as a listing for internal review by the medical safety team. Each case was assessed to determine whether it represented a GI perforation                                                                                                                                                                                                                                                     |
| Conjunctival disorders       | <p>The cluster for conjunctival disorders was included based on findings with dupilumab[2], a recently approved biologic medication for the treatment of AD</p> <p>Preferred terms that were included in the analysis of conjunctival disorders included:</p> <ul style="list-style-type: none"> <li>• Conjunctivitis</li> <li>• Conjunctivitis allergic</li> <li>• Keratitis</li> <li>• Non-infective conjunctivitis</li> <li>• Conjunctival hemorrhage</li> <li>• Conjunctival hyperemia</li> <li>• Dry eye</li> <li>• Giant papillary conjunctivitis</li> <li>• Seasonal allergy</li> </ul> <p>The search for these terms was based on the MedDRA SMQ 20000175</p> |
| Laboratory Analysis          | <p>Clinical laboratory tests including hematology and chemistry, including lipids, were performed at scheduled visits and assessed for each dataset. Evaluation of laboratory analytes included shift summaries in terms of CTCAE and NCEP for laboratory lipid analytes. Changes from baseline in laboratory analytes, to each scheduled visit time point were also evaluated.</p>                                                                                                                                                                                                                                                                                   |

*AD* atopic dermatitis, *AE* adverse event, *CTCAE* Common Terminology Criteria for Adverse Events, *DVT* deep vein thrombosis, *GI* gastrointestinal, *ICH* International Conference on Harmonisation, *MACE* major adverse cardiovascular event, *MedDRA* Medical Dictionary for Regulatory Activities, *NCEP* National Cholesterol Education Program, *NMSC* nonmelanoma skin cancer, *OI* opportunistic infection, *PE* pulmonary embolism, *PT* preferred term, *SAE* serious adverse event, *SMQ* standardized MedDRA queries, *TEAE* treatment-emergent adverse event, *vIGA-AD* validated Investigator Global Assessment for Atopic Dermatitis, *VTE* venous thromboembolism  
 Table was adapted from Bieber *et al.* 2021[3]

<sup>a</sup>Adverse events were classified based on the Medical Dictionary for Regulatory Activities (MedDRA), version 23.0

<sup>b</sup>Clusters were informed by the combination of standardized MedDRA queries (SMQs), medical assessment of preferred terms, and clusters previously used to establish the safety profile of baricitinib in rheumatoid arthritis

**Table S3** Conjunctival disorders by preferred term within cluster

|                                | <b>Placebo-controlled</b>       |                    | <b>All-bari-2-mg-AD</b> |
|--------------------------------|---------------------------------|--------------------|-------------------------|
|                                | <b>(to Week 16)<sup>a</sup></b> |                    |                         |
|                                | Placebo                         | Baricitinib 2 mg   | All-bari-2-mg-AD        |
|                                | (N=889)                         | (N=721)            | (N=1598)                |
|                                | n (adj %) [adj IR]              | n (adj %) [adj IR] | n [IR]                  |
| Conjunctival disorders         | 18 (2.4) [8.7]                  | 15 (2.0) [6.8]     | 51 [3.5]                |
| Conjunctivitis                 | 2 (0.3) [1.0]                   | 7 (0.9) [3.1]      | 25 [1.7]                |
| Conjunctivitis allergic        | 8 (1.0) [3.6]                   | 4 (0.6) [2.0]      | 14 [1.0]                |
| Seasonal allergy               | 2 (0.2) [0.7]                   | 3 (0.3) [1.2]      | 5 [0.3]                 |
| Conjunctival hyperaemia        | 0                               | 1 (0.1) [0.4]      | 1 [0.1]                 |
| Conjunctival haemorrhage       | 2 (0.3) [1.1]                   | 0                  | 2 [0.1]                 |
| Giant papillary conjunctivitis | 1 (0.1) [0.3]                   | 0                  | 0                       |
| Dry eye                        | 4 (0.7) [2.5]                   | 0                  | 1 [0.1]                 |
| Keratitis                      | 0                               | 0                  | 1 [0.1]                 |
| Xerophthalmia                  | 0                               | 0                  | 1 [0.1]                 |
| Conjunctival irritation        | 0                               | 0                  | 1 [0.1]                 |

AD atopic dermatitis, Adj adjusted, IR incidence rate, N number of patients in the safety population, n number of patients in the specified category

<sup>a</sup>For the placebo-controlled dataset, study-size adjusted percentages and IRs are shown

**Fig. S1** Selected laboratory analytes over time<sup>a</sup>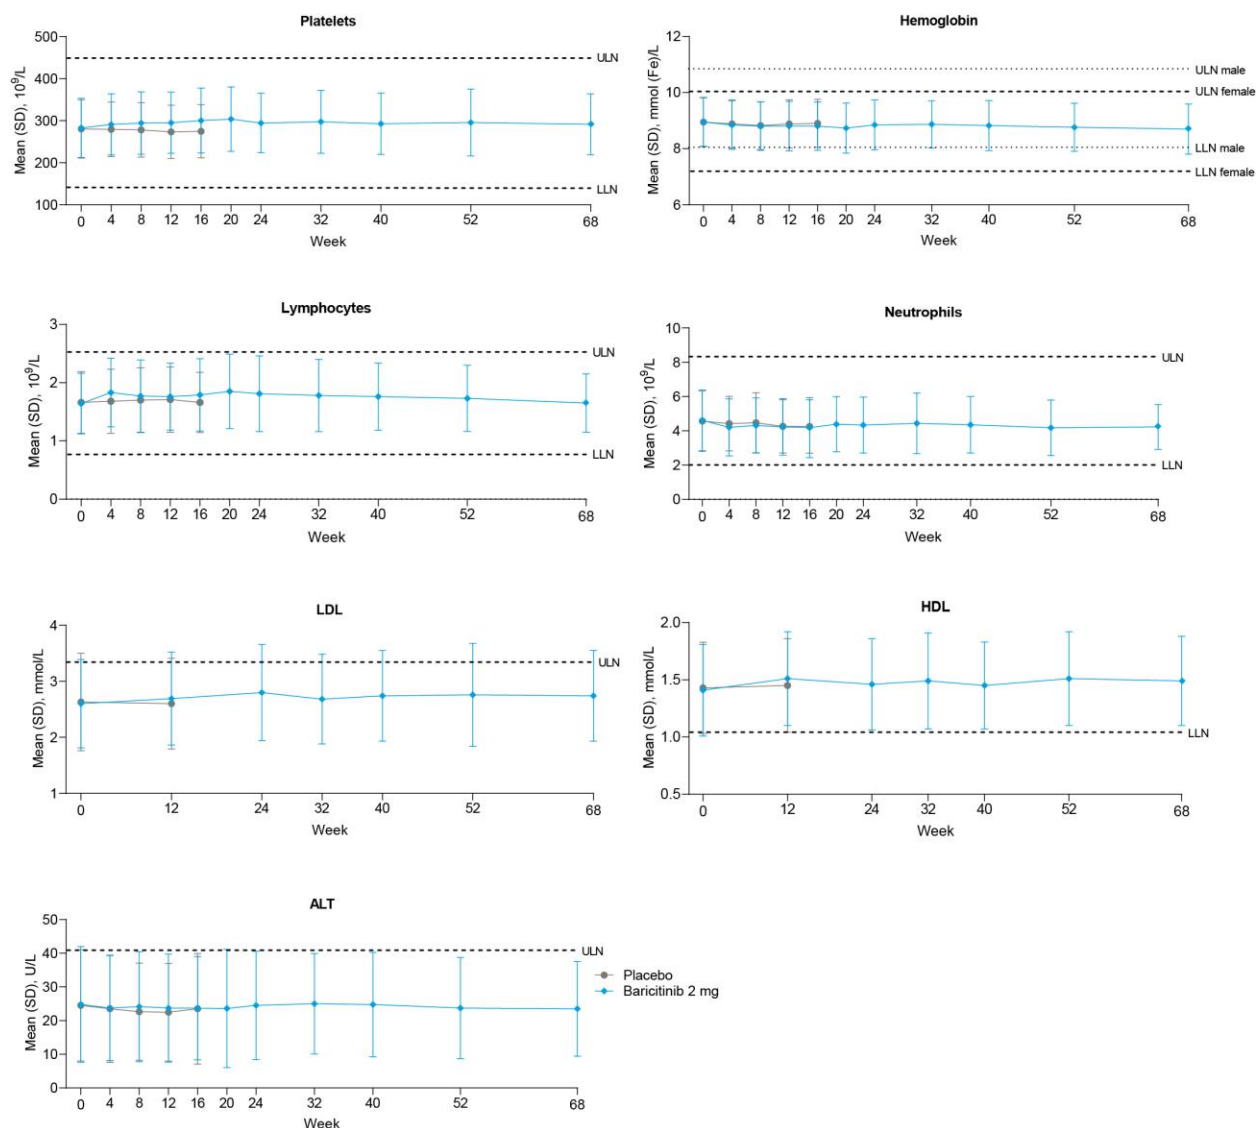

*ALT* alanine aminotransferase, *Fe* iron, *HDL* high-density lipoprotein, *LDL* low-density lipoprotein, *LLN* lower limit of normal, *SD* standard deviation, *U* units, *ULN* upper limit of normal

<sup>a</sup>Baricitinib 2 mg data beyond the 16-week placebo-controlled period are included from an extended dataset including studies BREEZE-AD1, BREEZE-AD2, BREEZE-AD3, BREEZE-AD4, BREEZE-AD5, and BREEZE-AD6

## References

1. Winthrop KL, Novosad SA, Baddley JW, Calabrese L, Chiller T, Polgreen P et al. Opportunistic infections and biologic therapies in immune-mediated inflammatory diseases: consensus recommendations for infection reporting during clinical trials and postmarketing surveillance. *Ann Rheum Dis*. 2015;74(12):2107-16. doi:10.1136/annrheumdis-2015-207841.
2. Akinlade B, Guttman-Yassky E, de Bruin-Weller M, Simpson EL, Blauvelt A, Cork MJ et al. Conjunctivitis in dupilumab clinical trials. *Br J Dermatol*. 2019;181(3):459-73. doi:10.1111/bjd.17869.
3. Bieber T, Thyssen JP, Reich K, Simpson EL, Katoh N, Torrelo A et al. Pooled safety analysis of baricitinib in adult patients with atopic dermatitis from 8 randomized clinical trials. *J Eur Acad Dermatol Venereol*. 2021;35(2):476-85. doi:10.1111/jdv.16948.
